# Supplementary material for: High-Dimensional Analysis of Single-Cell Flow Cytometry Data Predicts Relapse in Childhood Acute Lymphoblastic Leukaemia
Source: MDPI journal article supplement (doi:10.3390/cancers13010017), 2020-12-23
Supplement: s1 [file s1]

Article

# Supplementary Materials: High-dimensional analysis of single-cell flow cytometry data predicts relapse in Childhood Acute Lymphoblastic Leukemia

Salvador Chulián, Álvaro Martínez-Rubio, Víctor M. Pérez-García, María Rosa, Cristina Blázquez Goñi, Juan Francisco Rodríguez Gutiérrez, Lourdes Hermosín-Ramos, Águeda Molinos Quintana, Teresa Caballero-Velázquez, Manuel Ramírez-Orellana, Ana Castillo Robleda, Juan Luis Fernández-Martínez

\* Correspondence: victor.perezgarcia@uclm.es

Version December 2, 2020 submitted to Cancers

## 1 List of Figures

|   |    |                                                                                                     |   |
|---|----|-----------------------------------------------------------------------------------------------------|---|
| 2 | S1 | Mean of immunophenotypic markers for relapse and non-relapse patients. . . . .                      | 3 |
| 3 | S2 | Standard deviation of immunophenotypic markers for relapse and non-relapse patients. . . . .        | 4 |
| 4 | S3 | Markers with significant differences in parameters coming from intensity profiles fitting . . . . . | 5 |
| 5 | S4 | Example of curve fitting of CD38 expression . . . . .                                               | 5 |

- © 2020 by the authors. Submitted to *Cancers* for possible open access publication under the terms and conditions of the Creative Commons Attribution (CC BY) license (<http://creativecommons.org/licenses/by/4.0/>).

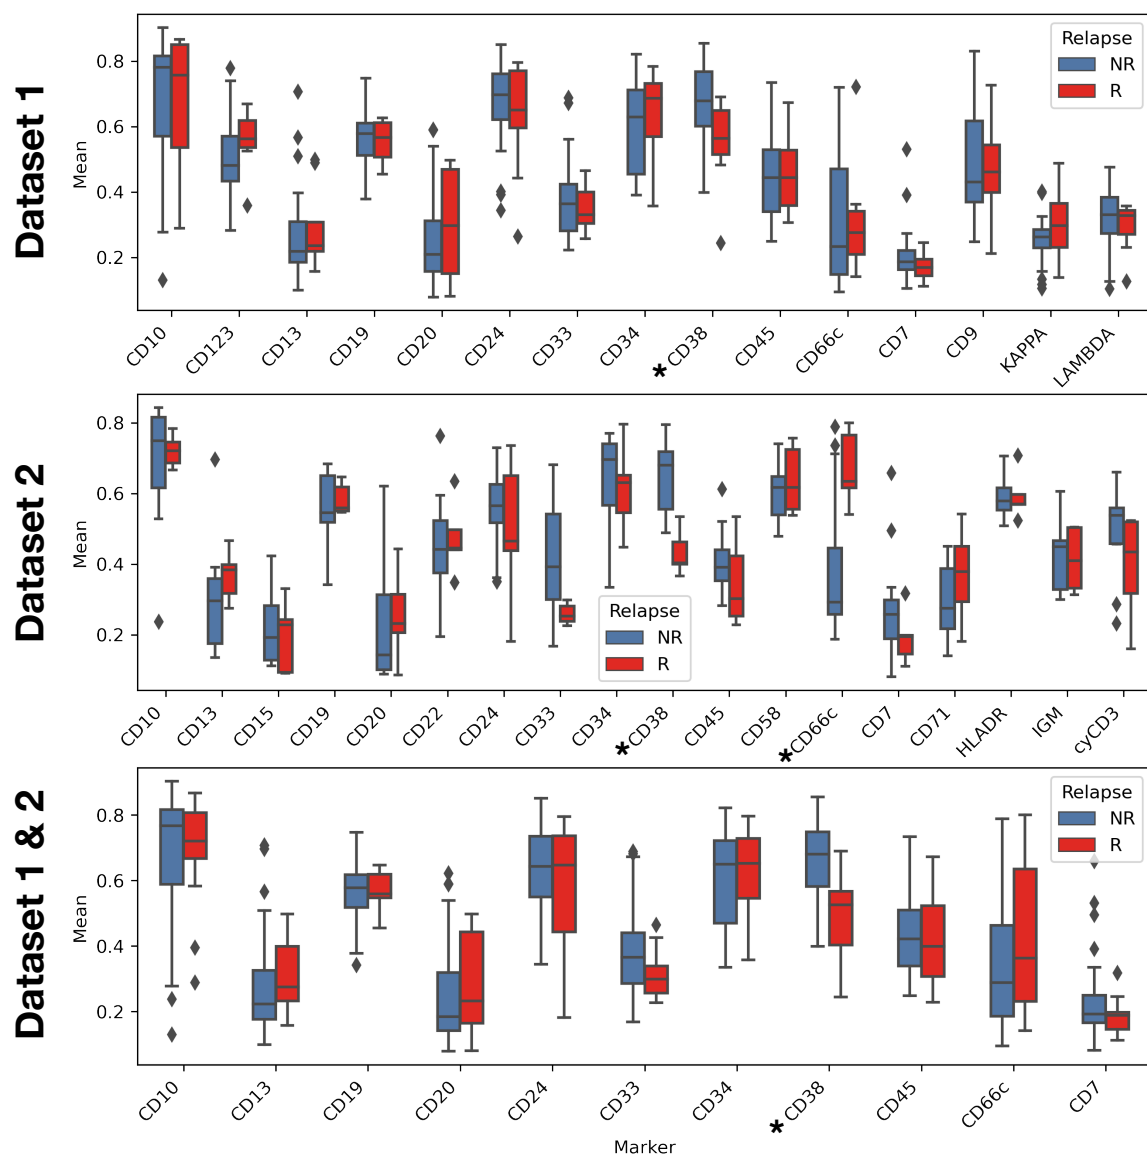

**Figure S1. Mean of immunophenotypic markers for relapse and non-relapse patients.** Comparison was performed via t-test and markers with differences and p-value lower than 0.05 are marked with \*.

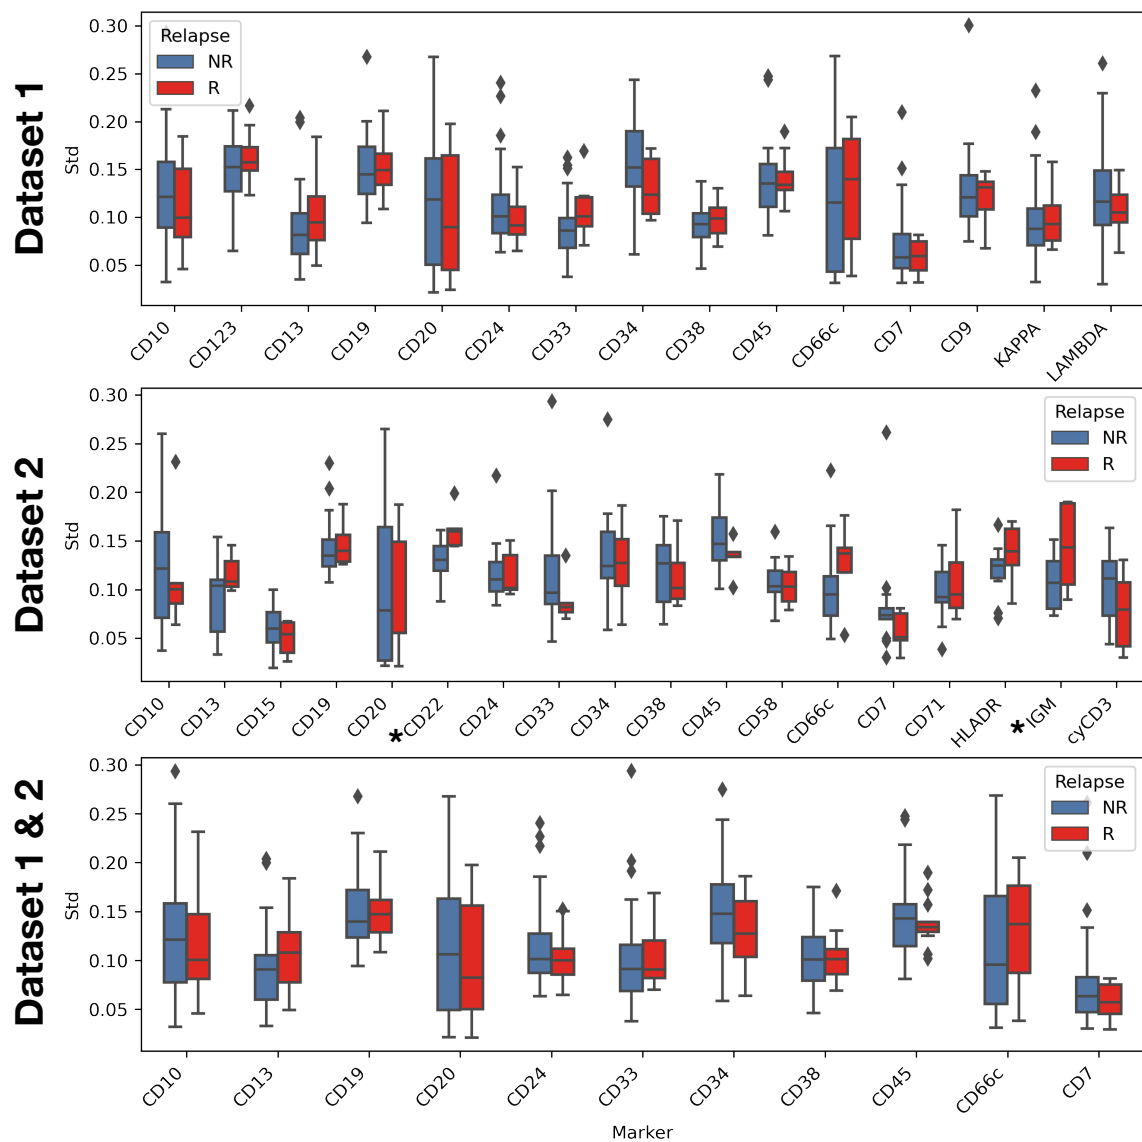

**Figure S2. Standard deviation of immunophenotypic markers for relapse and non-relapse patients.** Comparison was performed via t-test and markers with differences and p-value lower than 0.05 are marked with \*.

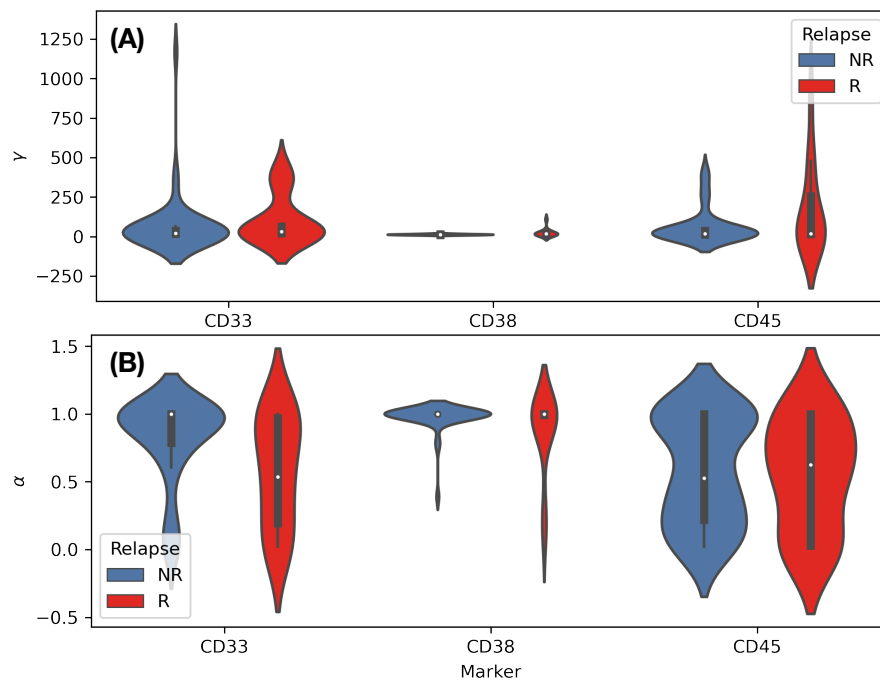

**Figure S3. Markers with significant differences in parameters coming from intensity profiles fitting.** (A) Differences for parameter  $\gamma$  in CD33, CD38 and CD45. (B) Differences for parameter  $\alpha$  in CD33, CD38 and CD45. White dots represents median and black range represent first and third quartile.

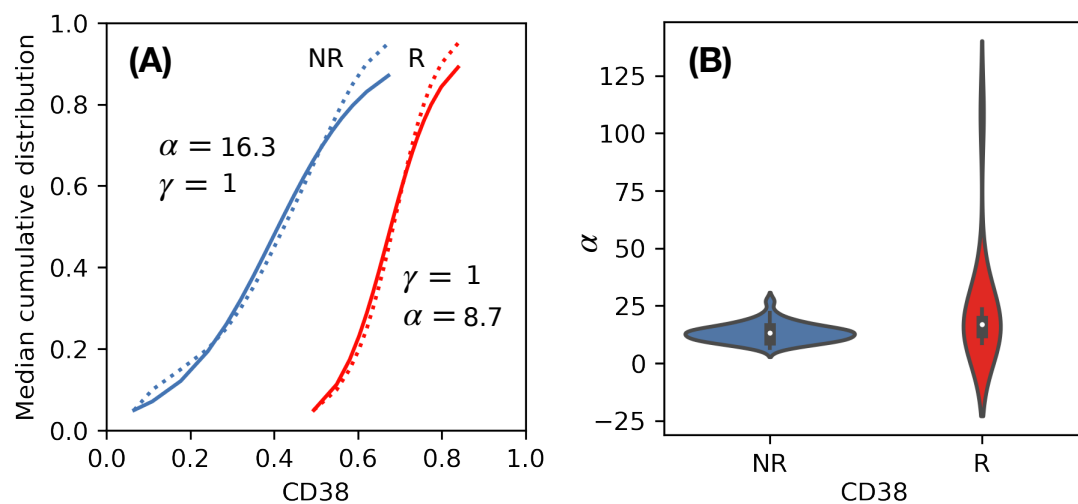

**Figure S4. Example of curve fitting of CD38 expression.** (A) Example of curve fitting for non-relapse and relapse patients. Parameters of the respective fits are included. (B) Differences for parameter  $\alpha$  in CD38. We note that although having different parameter  $\alpha$  this does not allow to distinguish between relapse and non-relapse patients.
